# Supplementary material for: Tracking official development assistance for reproductive health in conflict‐affected countries: 2002—2011
Source: PubMed Central journal article supplement — BJOG. 2016 Jan 28;123(10):1693–704. doi: 10.1111/1471-0528.13851 (PMC5066640; doi:10.1111/1471-0528.13851), 2016-01-28
Supplement: BJO-123-1693-s001.pdf [file BJO-123-1693-s001.pdf]

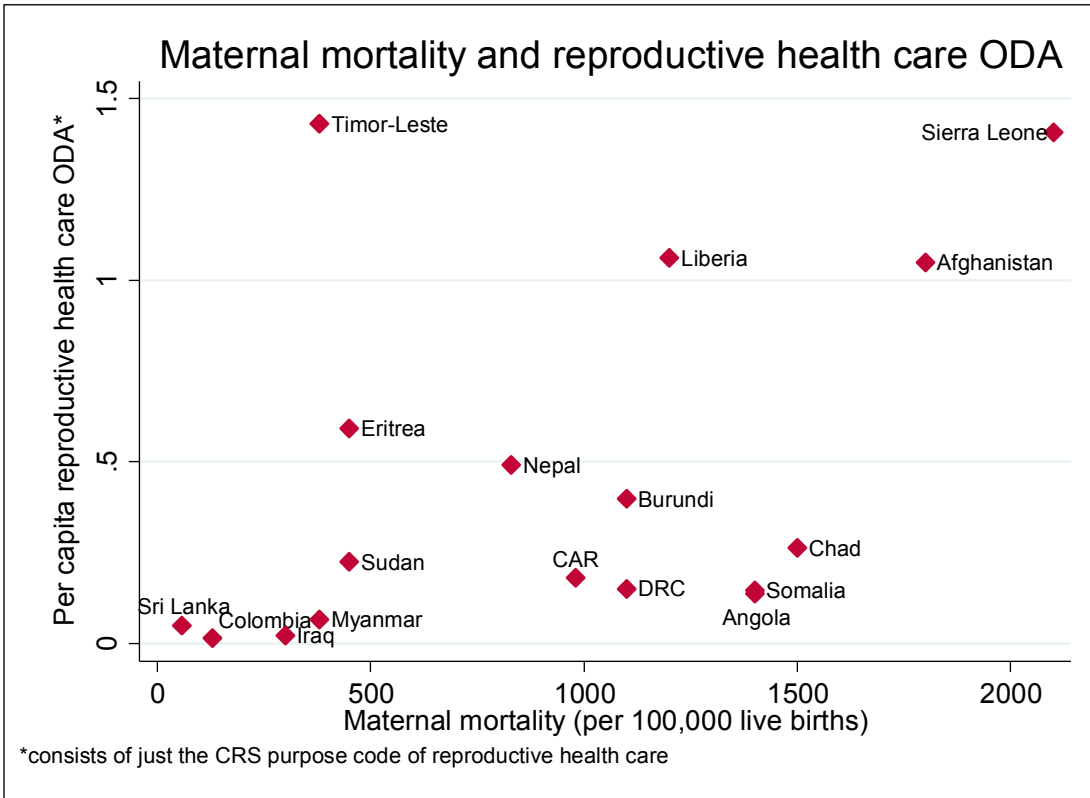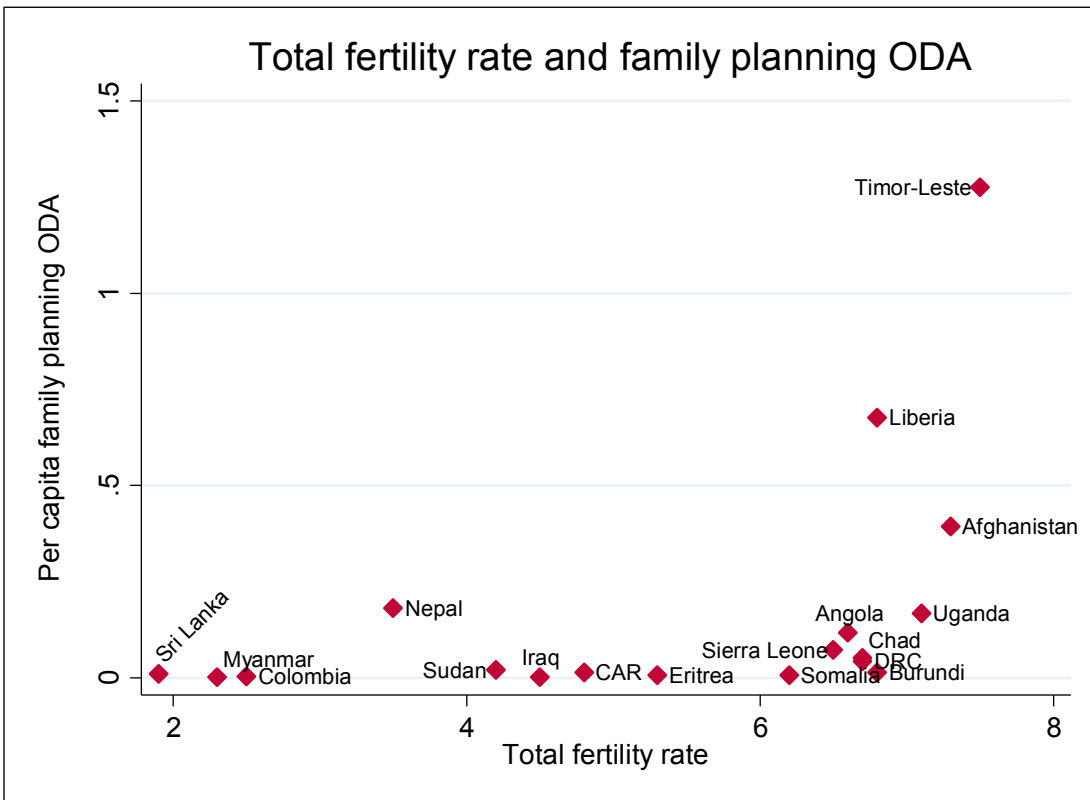

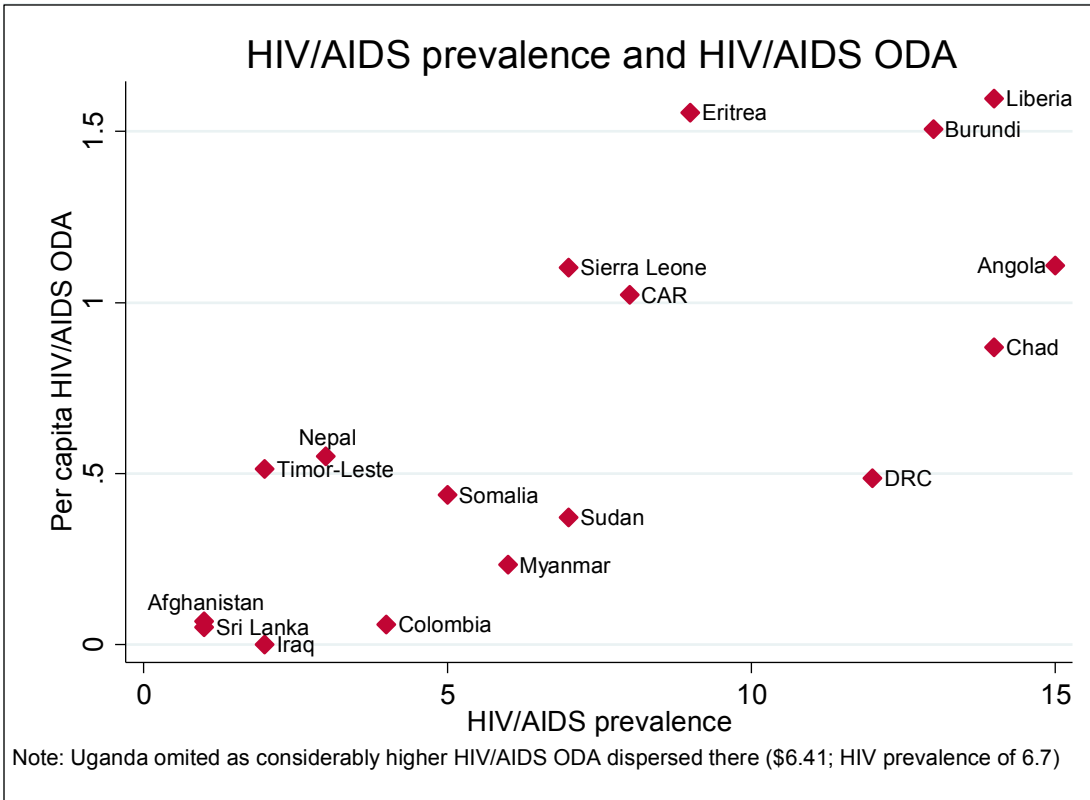

**Figure S1.** Scatter plots for reproductive health needs and average annual per capita ODA disbursement for conflict-affected countries (US \$)
