# Supplementary material for: Tracking official development assistance for reproductive health in conflict‐affected countries: 2002—2011
Source: PubMed Central journal article supplement — BJOG. 2016 Jan 28;123(10):1693–704. doi: 10.1111/1471-0528.13851 (PMC5066640; doi:10.1111/1471-0528.13851), 2016-01-28
Supplement: BJO-123-1693-s002.pdf [file BJO-123-1693-s002.pdf]

**Table S1.** Key reproductive health and socio-economic indicators for conflict and non-conflict-affected least-developed countries.

| Country                                                 | HIV/AIDS rate % <sup>1</sup> | MMR <sup>2</sup> | CPR <sup>3</sup> | TFR <sup>4</sup> | Population <sup>4</sup> | GDP per capita (US) <sup>5</sup> | Government effectiveness <sup>6</sup> | Control of corruption <sup>6</sup> |
|---------------------------------------------------------|------------------------------|------------------|------------------|------------------|-------------------------|----------------------------------|---------------------------------------|------------------------------------|
| <b>Conflict-affected countries:</b>                     |                              |                  |                  |                  |                         |                                  |                                       |                                    |
| Afghanistan                                             | <0.1                         | 1800             | 3.6              | 7.3              | 27.0                    | 300                              | -1.23                                 | -1.46                              |
| Angola                                                  | 3.7                          | 1400             | 4.5              | 6.6              | 15.4                    | 212                              | -1.17                                 | -1.33                              |
| Burundi                                                 | 3.3                          | 1100             | 10               | 6.8              | 8.7                     | 107                              | -1.26                                 | -0.9                               |
| CAR                                                     | 10.7                         | 980              | 6.9              | 4.8              | 4.5                     | 335                              | -1.6                                  | -1.21                              |
| Chad                                                    | 3.5                          | 1500             | 2.1              | 6.7              | 9.7                     | 654                              | -1.35                                 | -1.43                              |
| Colombia <sup>a</sup>                                   | 0.6                          | 130              | 64               | 2.5              | 42.3                    | 2656                             | -0.16                                 | -0.12                              |
| DRC                                                     | 3.2                          | 1100             | 4.4              | 6.7              | 63.5                    | NA                               | -1.59                                 | -1.43                              |
| Eritrea                                                 | 2.4                          | 450              | 5.1              | 5.3              | 5.3                     | 209                              | -0.97                                 | -0.21                              |
| Iraq <sup>a</sup>                                       | <0.2                         | 300              | 10.4             | 4.5              | 27.2                    | 1700                             | -1.66                                 | -1.46                              |
| Liberia                                                 | 3.5                          | 1200             | 5.5              | 6.8              | 3.2                     | 161                              | -1.37                                 | -1.04                              |
| Myanmar                                                 | 1.3                          | 380              | 32.8             | 2.3              | 51.4                    | 219                              | -1.55                                 | -1.56                              |
| Nepal                                                   | 0.5                          | 830              | 35.4             | 3.5              | 27.6                    | 322                              | -0.84                                 | -0.63                              |
| Sierra Leone                                            | 1.6                          | 2100             | 3.9              | 6.5              | 4.9                     | 223                              | -1.36                                 | -1.09                              |
| Somalia                                                 | 0.9                          | 1400             | NA               | 6.2              | 9.1                     | NA                               | -2.17                                 | -1.68                              |
| Sri Lanka <sup>a</sup>                                  | <0.1                         | 58               | 49.6             | 1.9              | 20.4                    | 1200                             | -0.29                                 | -0.37                              |
| Sudan                                                   | 1.6                          | 450              | 6.9              | 4.2              | 30.8                    | 820                              | -1.4                                  | -1.45                              |
| Timor Leste                                             | <0.2                         | 380              | 8.6              | 7.5              | 1.0                     | 352                              | -0.97                                 | -0.79                              |
| Uganda                                                  | 6.7                          | 550              | 18.2             | 7.1              | 28.3                    | 303                              | -0.54                                 | -0.85                              |
| <b>Non-conflict-affected least developed countries:</b> |                              |                  |                  |                  |                         |                                  |                                       |                                    |
| Bangladesh                                              | <0.1                         | 570              | 47.3             | 3.1              | 147.7                   | 400                              | -0.86                                 | -1.41                              |
| Benin                                                   | 1.8                          | 840              | 7.2              | 5.6              | 8.2                     | 592                              | -0.62                                 | -0.97                              |
| Bhutan                                                  | <0.1                         | 440              | 18.8             | 4.1              | 0.7                     | 1,126                            | 0.28                                  | 0.75                               |
| Burkina Faso                                            | 2                            | 700              | 8.6              | 6.5              | 14.6                    | 429                              | -0.6                                  | -0.09                              |
| Cambodia                                                | 1.6                          | 540              | 18.5             | 3.9              | 147.7                   | 430                              | -0.97                                 | -1.18                              |
| Cape Verde                                              | 0.1                          | 210              | 46               | 3.6              |                         | 2,065                            | -0.23                                 | 0.34                               |
| Comoros                                                 | <0.1                         | 400              | 19.3             | 4.6              | 0.7                     | 614                              | -1.64                                 | -0.83                              |
| Djibouti                                                | 3.1                          | 650              | NA               | 4.8              | 0.7                     | 973                              | -0.82                                 | -0.68                              |
| Equatorial Guinea                                       | 3.2                          | 680              | NA               | 5.9              | 0.6                     | 6,205                            | -1.45                                 | -1.61                              |
| Ethiopia                                                | 2.1                          | 720              | 6.3              | 5.7              | 78.0                    | 153                              | -0.88                                 | -0.77                              |
| Gambia                                                  | 2.4                          | 690              | 8.9              | 4.5              | 1.6                     | 305                              | -0.67                                 | -0.71                              |
| Guinea                                                  | 1.5                          | 910              | 4.2              | 5.7              | 9.5                     | 354                              | -1.06                                 | -1.01                              |
| Guinea Bissau                                           | 3.8                          | 1100             | 3.6              | 7.1              | 1.5                     | 190                              | -1.38                                 | -1.1                               |
| Haiti                                                   | 3.8                          | 670              | 22.3             | 3.8              | 9.4                     | 478                              | -1.38                                 | -1.45                              |
| Kiribati                                                | NA                           | NA               | NA               | NA               | 0.1                     | 672                              | -0.52                                 | 0.24                               |
| Laos                                                    | 0.1                          | 660              | 28.9             | 4.6              | 6.0                     | 485                              | -1.22                                 | -1.32                              |
| Lesotho                                                 | 23.2                         | 960              | 29.5             | 3.5              | 1.9                     | 620                              | -0.17                                 | -0.04                              |
| Madagascar                                              | 0.5                          | 510              | 16.7             | 5.2              | 19.0                    | 281                              | -0.37                                 | 0.1                                |
| Malawi                                                  | 14.1                         | 1100             | 26.1             | 5.9              | 14.1                    | 161                              | -0.8                                  | -0.74                              |
| Maldives                                                | 0.2                          | 120              | 33               | 4.1              | 0.3                     | 2,349                            | 0.16                                  | -0.3                               |
| Mali                                                    | 1.7                          | 970              | 5.7              | 6.8              | 13.2                    | 431                              | -0.69                                 | -0.4                               |

|                                             |            |               |             |            |             |              |       |       |
|---------------------------------------------|------------|---------------|-------------|------------|-------------|--------------|-------|-------|
| Mauritania                                  | 0.7        | 820           | 5.1         | 5.6        | 3.0         | 662          | -0.33 | -0.36 |
| Mozambique                                  | 16.1       | 520           | 11.8        | 5.3        | 20.8        | 331          | -0.52 | -0.54 |
| Niger                                       | 1.1        | 1,800         | 4.3         | 7.7        | 13.6        | 273          | -0.79 | -0.73 |
| Rwanda                                      | 3.1        | 1,300         | 4.3         | 5.5        | 10.1        | 242          | -0.89 | -0.74 |
| Samoa                                       | NA         | 130           | NA          | 4.2        | 0.2         | 1,832        | 0.45  | 0.15  |
| Sao Tome & Principe                         | NA         | NA            | 27.4        | NA         | 0.2         | 430          | -0.71 | -0.86 |
| Senegal                                     | 0.9        | 980           | 8.2         | 4.8        | 11.3        | 738          | -0.25 | -0.03 |
| Solomon Islands                             | NA         | 220           | NA          | 4.1        | 0.5         | 611          | -0.73 | 0.06  |
| Tanzania                                    | 6.5        | 950           | 16.9        | 4.7        | 40.3        | 336          | -0.39 | -0.65 |
| Togo                                        | 3.2        | 510           | 9.3         | 5.1        | 6.0         | 376          | -1.5  | -0.79 |
| Tuvalu                                      | NA         | NA            | NA          | NA         | 0.0         | NA           | -0.07 | -0.11 |
| Vanuatu                                     | NA         | 130*          | NA          | 3.9        | 0.2         | 1,530        | -0.35 | 0.34  |
| Yemen                                       | <0.2       | 430           | 9.8         | 5.9        | 21.3        | 585          | -0.93 | -0.79 |
| Zambia                                      | 17         | 830           | 22.6        | 5.4        | 11.9        | 626          | -0.94 | -0.79 |
| Zimbabwe                                    | 20.1       | 1100          | 50.4        | 3.4        | 13.0        | 382          | -1.29 | -1.28 |
| <b>All conflict average<sup>b</sup></b>     | <b>2.5</b> | <b>894.9</b>  | <b>16</b>   | <b>5.4</b> | <b>21.4</b> | <b>730.6</b> |       |       |
| <b>LDC conflict average<sup>c</sup></b>     | <b>2.9</b> | <b>1041.3</b> | <b>10.6</b> | <b>5.9</b> | <b>19.3</b> | <b>471.8</b> |       |       |
| <b>Non-conflict LDC average<sup>d</sup></b> | <b>4.5</b> | <b>719.69</b> | <b>18</b>   | <b>5</b>   | <b>13.4</b> | <b>808</b>   |       |       |

Abbreviations: CAR, Central Africa Republic; CPR, Contraceptive Prevalence Rate; DRC, Democratic Republic of the Congo; GDP, Gross Domestic Product; LDC, Least-Developed Countries; NA; Not Available; ODA, Official Development Assistance; RH, reproductive health; TFR, Total Fertility Rate; US \$, US dollars.

2005 data used to provide approximate mid-point data for the period in question.

Sources:

<sup>1</sup> Adult (age 15-49) % rate for 2005. Data from '2006 Report on the global AIDS epidemic', UNAIDS (2007).

<sup>2</sup> Maternal deaths per 100,000 live births. Data from 'Maternal Mortality in 2005', Maternal Mortality in 2005: Estimates developed by WHO, UNICEF, UNFPA, and The World Bank (2006).

<sup>3</sup> Contraceptive prevalence rate for modern contraceptive methods only based upon data and definitions from 'World Contraceptive Use 2005', United Nations Department of Economic and Social Affairs, Population Division (2006).

<sup>4</sup> Population data from: US Census Bureau

(<http://www.census.gov/population/international/data/idb/informationGateway.php>).

<sup>5</sup> Data from International Monetary Fund, World Economic Outlook Database (September 2006).

<sup>6</sup> Data from World Bank's Worldwide Governance Indicators (year 2005) ([www.govindicators.org](http://www.govindicators.org)). Score range is from -2.5 to 2.5, with lower scores indicating worse rating in government effectiveness and control of corruption.

Notes:

<sup>a</sup> Non LDC conflict-affected countries.

<sup>b</sup> Average of all 18 conflict-affected countries (both LDC and non LDC).

<sup>c</sup> Average of the 15 conflict-affected countries in the LDC category.

<sup>d</sup> Average of the 36 non-conflict-affected countries in the LDC category

**Table S2.** All ODA (US \$ million) to conflict-affected countries, by year

| Country                      | 2002           | 2003           | 2004           | 2005           | 2006           | 2007           | 2008           | 2009           | 2010           | 2011           | Mean<br>2002-2011 |
|------------------------------|----------------|----------------|----------------|----------------|----------------|----------------|----------------|----------------|----------------|----------------|-------------------|
| Afghanistan                  | 1413.2         | 1706.2         | 2214.6         | 3161.5         | 3141.9         | 3903.9         | 4673.9         | 5690.4         | 6655.8         | 6545.6         | 3910.7            |
| Angola                       | 488.9          | 602.5          | 1400.3         | 512.9          | 354.3          | 399.3          | 323.4          | 253.7          | 246.3          | 253.5          | 483.5             |
| Burundi                      | 242.6          | 271.6          | 481.3          | 460.7          | 530.2          | 525.1          | 457.0          | 1751.0         | 548.4          | 577.8          | 584.6             |
| CAR                          | 78.9           | 66.0           | 129.8          | 109.4          | 219.9          | 239.9          | 214.7          | 901.7          | 222.3          | 275.5          | 245.8             |
| Chad                         | 384.4          | 365.8          | 395.2          | 477.0          | 366.0          | 407.3          | 424.5          | 507.7          | 397.0          | 508.2          | 423.3             |
| Colombia                     | 617.2          | 1014.2         | 676.2          | 833.2          | 1145.6         | 798.1          | 976.1          | 969.6          | 867.2          | 1014.6         | 891.2             |
| DRC                          | 2251.9         | 7372.8         | 2313.7         | 2493.9         | 2575.7         | 1560.7         | 1642.3         | 2099.8         | 5370.9         | 7444.5         | 3512.6            |
| Eritrea                      | 272.0          | 369.4          | 290.0          | 407.2          | 149.9          | 159.3          | 106.7          | 93.3           | 88.4           | 129.0          | 206.5             |
| Iraq                         | 143.0          | 2682.4         | 5248.6         | 25625.2        | 10223.6        | 10175.2        | 10608.0        | 2791.6         | 2142.8         | 1883.7         | 7152.4            |
| Liberia                      | 69.6           | 128.6          | 246.4          | 265.7          | 292.9          | 807.3          | 1159.9         | 468.4          | 971.7          | 1000.7         | 541.1             |
| Myanmar                      | 111.7          | 135.0          | 136.4          | 172.1          | 173.3          | 221.2          | 462.5          | 267.7          | 268.2          | 387.7          | 233.6             |
| Nepal                        | 423.6          | 592.9          | 494.7          | 509.9          | 573.0          | 608.4          | 695.5          | 729.2          | 843.1          | 1033.8         | 650.4             |
| Sierra Leone                 | 538.4          | 442.2          | 456.8          | 404.9          | 895.2          | 1158.8         | 300.0          | 370.3          | 370.2          | 413.8          | 535.1             |
| Somalia                      | 173.5          | 216.8          | 235.0          | 263.6          | 433.5          | 404.4          | 652.9          | 577.1          | 410.6          | 998.7          | 436.6             |
| Sri Lanka                    | 607.4          | 963.7          | 758.0          | 1322.2         | 1203.2         | 987.6          | 986.1          | 1029.0         | 1058.7         | 1106.5         | 1002.2            |
| Sudan                        | 330.4          | 505.6          | 1039.8         | 2008.8         | 2140.5         | 2118.7         | 1932.2         | 2160.5         | 1757.0         | 1147.5         | 1514.1            |
| Timor-Leste                  | 326.6          | 231.9          | 199.9          | 262.8          | 281.6          | 334.4          | 274.4          | 226.9          | 300.7          | 278.5          | 271.8             |
| Uganda                       | 1076.3         | 1290.9         | 1521.2         | 1483.8         | 6060.2         | 1751.2         | 1542.8         | 1734.2         | 1679.3         | 1590.2         | 1973.0            |
| <b>All Conflict</b>          | <b>9549.4</b>  | <b>18958.5</b> | <b>18237.9</b> | <b>40774.6</b> | <b>30760.5</b> | <b>26560.7</b> | <b>27433.1</b> | <b>22622.1</b> | <b>24198.6</b> | <b>26589.9</b> | <b>24568.5</b>    |
| <b>LDC Conflict</b>          | <b>8181.8</b>  | <b>14298.2</b> | <b>11555.1</b> | <b>12994.1</b> | <b>18188.1</b> | <b>14599.9</b> | <b>14862.9</b> | <b>17832.0</b> | <b>20129.8</b> | <b>22585.1</b> | <b>15522.7</b>    |
| <b>Non-Conflict<br/>LDCs</b> | <b>17654.1</b> | <b>16934.3</b> | <b>19911.7</b> | <b>20249.0</b> | <b>54869.7</b> | <b>22729.6</b> | <b>21376.1</b> | <b>21742.1</b> | <b>24701.2</b> | <b>26183.5</b> | <b>24635.1</b>    |

Abbreviations: CAR, Central Africa Republic; DRC, Democratic Republic of the Congo; GDP, gross domestic product; LDC, least-developed countries; NA, not available; ODA, official development assistance; RH, reproductive health; US \$, US dollars. All Data are in constant US\$ with 2011 as the base year, using deflator rates used by CRS to incorporate donor exchange rate differences and inflation during the period in question.

<sup>a</sup> Non-LDC conflict-affected countries.

<sup>b</sup> Total for all 18 conflict-affected countries (both LDC and non LDC).

<sup>c</sup> Total for the 15 conflict-affected countries in the LDC category.

<sup>d</sup> Total for 36 non-conflict-affected countries in the LDC category.

Population data from: US Census Bureau (<http://www.census.gov/population/international/data/idb/informationGateway.php>).

**Table S3.** Distribution of reproductive health ODA 2002-2011 to conflict-affected countries, by activity (US \$ million)

| Category                                                    | RH ODA (US \$ million) |               |               |               |               |               |               |               |               |               |                | Annual Average<br>RH ODA | % of All RH ODA | US\$ million<br>increase 2002-11 | % increase 2002 -<br>11 | Average annual %<br>increase | % of total RH ODA<br>increase |
|-------------------------------------------------------------|------------------------|---------------|---------------|---------------|---------------|---------------|---------------|---------------|---------------|---------------|----------------|--------------------------|-----------------|----------------------------------|-------------------------|------------------------------|-------------------------------|
|                                                             | 2002                   | 2003          | 2004          | 2005          | 2006          | 2007          | 2008          | 2009          | 2010          | 2011          | Total          |                          |                 |                                  |                         |                              |                               |
| <b>Direct activities:</b>                                   |                        |               |               |               |               |               |               |               |               |               |                |                          |                 |                                  |                         |                              |                               |
| Population policy and admin. management                     | 45.18                  | 56.63         | 58.05         | 36.26         | 61.41         | 59.77         | 16.66         | 15.98         | 17.08         | 47.55         | 414.58         | 41.46                    | 5.55            | 2.37                             | 5.25                    | 16.61                        | 0.26                          |
| Reproductive health care                                    | 33.42                  | 57.69         | 44.96         | 99.27         | 74.83         | 63.56         | 82.10         | 139.58        | 191.86        | 208.56        | 995.84         | 99.58                    | 13.33           | 175.14                           | 524.06                  | 27.70                        | 19.34                         |
| Family Planning                                             | 20.47                  | 11.92         | 7.38          | 2.71          | 3.66          | 1.53          | 30.88         | 78.33         | 74.81         | 74.51         | 306.19         | 30.62                    | 4.10            | 54.04                            | 264.00                  | 190.08                       | 5.97                          |
| Personnel management for population and reproductive health | 0.17                   |               | 0.02          |               | 0.09          | 0.16          | 0.23          | 0.15          | 0.81          | 3.00          | 4.64           | 0.58                     | 0.06            | 2.83                             | 1664.71                 | 79.71                        | 0.31                          |
| Social mitigation of HIV/AIDS                               | 1.01                   | 3.11          | 3.49          | 6.88          | 10.94         | 12.27         | 11.02         | 10.75         | 8.01          | 17.69         | 85.18          | 8.52                     | 1.14            | 16.68                            | 1651.49                 | 47.12                        | 1.84                          |
| STD control, including HIV/AIDS                             | 56.74                  | 124.19        | 252.28        | 333.79        | 364.93        | 425.13        | 307.85        | 355.60        | 371.15        | 550.07        | 3141.73        | 314.17                   | 42.06           | 493.33                           | 869.46                  | 32.07                        | 54.49                         |
| <i>Sub-total direct activities</i>                          | <i>156.99</i>          | <i>253.54</i> | <i>366.18</i> | <i>478.91</i> | <i>515.86</i> | <i>562.42</i> | <i>448.74</i> | <i>600.39</i> | <i>663.72</i> | <i>901.38</i> | <i>4948.16</i> | <i>494.81</i>            | <i>66.24</i>    | <i>744.39</i>                    | <i>474.16</i>           | <i>23.71</i>                 | <i>82.21</i>                  |
| <b>Indirect Activities:</b>                                 |                        |               |               |               |               |               |               |               |               |               |                |                          |                 |                                  |                         |                              |                               |
| Primary education                                           | 23.05                  | 19.30         | 28.25         | 39.26         | 24.62         | 27.89         | 34.32         | 38.88         | 43.06         | 37.55         | 316.19         | 31.62                    | 4.23            | 14.5                             | 62.91                   | 7.94                         | 1.60                          |
| Non-formal education                                        | 1.57                   | 2.12          | 1.60          | 3.00          | 1.87          | 2.34          | 3.90          | 3.51          | 6.16          | 4.22          | 30.29          | 3.03                     | 0.41            | 2.65                             | 168.79                  | 18.61                        | 0.29                          |

|                                                       |               |               |               |               |               |               |               |               |               |                |                |               |              |               |               |              |              |
|-------------------------------------------------------|---------------|---------------|---------------|---------------|---------------|---------------|---------------|---------------|---------------|----------------|----------------|---------------|--------------|---------------|---------------|--------------|--------------|
| Pre-school education                                  | 0.18          | 0.53          | 0.76          | 1.03          | 0.84          | 1.23          | 1.02          | 2.03          | 1.32          | 1.34           | 10.27          | 1.03          | 0.14         | 1.16          | 644.44        | 34.98        | 0.13         |
| Secondary education                                   | 2.29          | 1.35          | 1.50          | 2.02          | 2.33          | 2.65          | 4.82          | 3.77          | 10.11         | 3.87           | 34.71          | 3.47          | 0.46         | 1.58          | 69.00         | 20.04        | 0.17         |
| Health policy and admin. management                   | 8.10          | 18.10         | 14.42         | 16.86         | 13.52         | 9.93          | 12.34         | 14.35         | 15.28         | 16.82          | 139.72         | 13.97         | 1.87         | 8.72          | 107.65        | 13.08        | 0.96         |
| Basic health care                                     | 30.74         | 44.74         | 63.61         | 76.96         | 108.48        | 109.54        | 77.30         | 69.03         | 67.27         | 137.24         | 784.93         | 78.49         | 10.51        | 106.5         | 346.45        | 21.20        | 11.76        |
| Basic health infrastructure                           | 9.89          | 13.11         | 10.65         | 119.54        | 65.58         | 57.24         | 19.32         | 29.86         | 31.37         | 18.97          | 375.54         | 37.55         | 5.03         | 9.08          | 91.81         | 93.22        | 1.00         |
| Nutrition                                             | 19.27         | 10.28         | 13.36         | 20.34         | 28.06         | 20.77         | 11.62         | 42.23         | 24.21         | 23.84          | 213.98         | 21.40         | 2.86         | 4.57          | 23.72         | 22.27        | 0.50         |
| Health education                                      | 1.01          | 1.81          | 1.47          | 1.66          | 1.17          | 1.14          | 1.06          | 1.46          | 2.15          | 3.14           | 16.07          | 1.61          | 0.22         | 2.13          | 210.89        | 16.53        | 0.24         |
| Health personnel development                          | 0.63          | 1.81          | 2.30          | 1.79          | 1.92          | 2.33          | 4.34          | 4.12          | 3.51          | 3.51           | 26.27          | 2.63          | 0.35         | 2.88          | 457.14        | 28.72        | 0.32         |
| General budget support                                | 24.37         | 11.32         | 11.76         | 11.63         | 12.60         | 10.85         | 4.18          | 6.57          | 8.51          | 8.20           | 109.99         | 11.00         | 1.47         | -16.17        | -66.35        | -3.47        | -1.79        |
| Humanitarian: material relief assistance and services | 21.39         | 29.74         | 43.76         | 47.18         | 38.67         | 41.96         | 38.90         | 38.12         | 25.57         | 43.17          | 368.47         | 36.85         | 4.93         | 21.78         | 101.82        | 11.11        | 2.41         |
| Humanitarian: Reconst., relief and rehabilitation     | 4.04          | 4.21          | 8.26          | 11.54         | 16.20         | 11.32         | 15.87         | 9.66          | 9.10          | 5.66           | 95.85          | 9.58          | 1.28         | 1.62          | 40.10         | 10.78        | 0.18         |
| <i>Sub-total indirect activities</i>                  | <i>146.53</i> | <i>158.42</i> | <i>201.7</i>  | <i>352.81</i> | <i>315.86</i> | <i>299.19</i> | <i>228.99</i> | <i>263.59</i> | <i>247.62</i> | <i>307.53</i>  | <i>2522.28</i> | <i>252.22</i> | <i>33.76</i> | <i>161.00</i> | <i>109.88</i> | <i>11.6</i>  | <i>17.77</i> |
| <b>Total RH ODA</b>                                   | <b>303.51</b> | <b>411.97</b> | <b>567.90</b> | <b>831.72</b> | <b>831.71</b> | <b>861.60</b> | <b>677.74</b> | <b>864.01</b> | <b>911.35</b> | <b>1208.92</b> | <b>7470.43</b> | <b>747.04</b> | <b>100.0</b> | <b>905.39</b> | <b>298.31</b> | <b>16.79</b> | <b>100.0</b> |

**Table S4.** Comparison of HIV only disbursements versus disbursements for all other direct and indirect reproductive health activities, by conflict status

| Category                 | RH ODA (US \$ millions) |                |                |                |                |                |                |                |                |                | Total<br>2002-<br>2011 | Mean<br>2002-<br>2011 | Average<br>annual RH<br>ODA (US \$)<br>per capita |
|--------------------------|-------------------------|----------------|----------------|----------------|----------------|----------------|----------------|----------------|----------------|----------------|------------------------|-----------------------|---------------------------------------------------|
|                          | 2002                    | 2003           | 2004           | 2005           | 2006           | 2007           | 2008           | 2009           | 2010           | 2011           |                        |                       |                                                   |
| <b>ALL LDCs</b>          | <b>1029.64</b>          | <b>1406.69</b> | <b>1799.99</b> | <b>2156.97</b> | <b>2405.10</b> | <b>2910.80</b> | <b>2381.77</b> | <b>2759.61</b> | <b>2942.06</b> | <b>4298.54</b> | <b>24091.18</b>        | 2409.12               | <b>6.20</b>                                       |
| HIV ODA                  | 232.99                  | 504.71         | 936.57         | 1257.43        | 1434.28        | 1871.19        | 1434.53        | 1594.01        | 1718.29        | 2648.98        | 13632.97               | 1363.30               | 3.51                                              |
| All except HIV           | 796.65                  | 901.98         | 863.42         | 899.54         | 970.82         | 1039.62        | 947.24         | 1165.61        | 1223.77        | 1649.56        | 10458.21               | 1045.82               | 2.69                                              |
| <b>LDCs conflict</b>     | <b>289.09</b>           | <b>378.39</b>  | <b>511.26</b>  | <b>670.62</b>  | <b>695.76</b>  | <b>775.24</b>  | <b>640.09</b>  | <b>820.58</b>  | <b>873.72</b>  | <b>1162.32</b> | <b>6817.08</b>         | 681.71                | <b>2.35</b>                                       |
| RH ODA excluding HIV     | 56.02                   | 126.61         | 254.83         | 336.47         | 368.42         | 434.42         | 318.15         | 366.04         | 378.25         | 552.22         | 3191.41                | 319.14                | 1.10                                              |
| HIV ODA                  | 233.07                  | 251.79         | 256.44         | 334.15         | 327.35         | 340.82         | 321.94         | 454.54         | 495.47         | 610.11         | 3625.67                | 362.57                | 1.25                                              |
| <b>LDCs non-conflict</b> | <b>740.55</b>           | <b>1028.30</b> | <b>1288.73</b> | <b>1486.35</b> | <b>1709.34</b> | <b>2135.56</b> | <b>1741.67</b> | <b>1939.04</b> | <b>2068.35</b> | <b>3136.21</b> | <b>17274.10</b>        | 1727.41               | <b>3.60</b>                                       |
| RH ODA excluding HIV     | 176.97                  | 378.10         | 681.74         | 920.96         | 1065.86        | 1436.77        | 1116.38        | 1227.97        | 1340.04        | 2096.76        | 10441.56               | 1044.16               | 2.17                                              |
| HIV ODA                  | 563.58                  | 650.19         | 606.99         | 565.39         | 643.48         | 698.79         | 625.29         | 711.07         | 728.31         | 1039.45        | 6832.54                | 683.25                | 1.42                                              |

Abbreviations: LDC, Least-Developed Countries; ODA, Official Development Assistance; RH, Reproductive Health; US \$, US dollars.

**Table S5.** Donor disbursement of reproductive health ODA for sampled conflict-affected countries (US \$ million)

| Donor            | RH ODA (US \$ million) |        |        |        |        |        |        |        |        |        | Annual average 2002-2011 | % of all donors | % Direct RH ODA <sup>a</sup> | All ODA annual average 2002-2011 | RH as % of all ODA |
|------------------|------------------------|--------|--------|--------|--------|--------|--------|--------|--------|--------|--------------------------|-----------------|------------------------------|----------------------------------|--------------------|
|                  | 2002                   | 2003   | 2004   | 2005   | 2006   | 2007   | 2008   | 2009   | 2010   | 2011   |                          |                 |                              |                                  |                    |
| <b>Bilateral</b> |                        |        |        |        |        |        |        |        |        |        |                          |                 |                              |                                  |                    |
| Australia        | 3.38                   | 5.90   | 5.68   | 4.71   | 4.43   | 4.62   | 7.48   | 10.50  | 20.15  | 17.52  | 8.44                     | 1.13            | 35.9                         | 454.25                           | 1.86               |
| Austria          | 0.31                   | 0.20   | 0.47   | 0.33   | 0.31   | 0.70   | 0.24   | 0.10   | 0.18   | 0.22   | 0.31                     | 0.04            | 32.5                         | 314.82                           | 0.10               |
| Belgium          | 4.38                   | 5.23   | 8.40   | 9.56   | 15.66  | 15.59  | 8.71   | 12.32  | 16.79  | 8.96   | 10.56                    | 1.41            | 45.9                         | 517.07                           | 2.04               |
| Canada           | 2.80                   | 4.50   | 5.38   | 3.07   | 3.59   | 12.23  | 9.91   | 13.75  | 7.53   | 9.78   | 7.25                     | 0.97            | 19.5                         | 468.73                           | 1.55               |
| Czech Republic   |                        |        |        |        |        |        |        |        |        | 0.08   | 0.08                     | 0.01            | 0.0                          | 15.91                            | 0.49               |
| Denmark          |                        | 6.23   | 7.50   | 7.98   | 6.99   | 11.88  | 12.87  | 14.16  | 11.97  | 16.97  | 10.73                    | 1.44            | 60.6                         | 209.56                           | 5.12               |
| Finland          | 3.23                   | 3.45   |        |        | 2.70   | 4.01   | 3.85   | 4.30   | 4.01   | 3.45   | 3.62                     | 0.49            | 56.0                         | 98.36                            | 3.68               |
| France           | 1.32                   | 1.92   | 1.64   | 5.18   | 2.14   | 2.10   | 1.74   | 4.62   | 5.50   | 4.81   | 3.10                     | 0.41            | 22.4                         | 996.13                           | 0.31               |
| Germany          | 8.93                   | 12.46  | 11.65  | 13.02  | 16.87  | 16.30  | 18.84  | 23.68  | 29.68  | 27.53  | 17.90                    | 2.40            | 50.3                         | 1523.39                          | 1.17               |
| Greece           | 0.13                   | 0.26   | 0.36   | 2.72   | 0.30   | 0.11   | 0.24   | 0.45   | 0.07   | 0.00   | 0.46                     | 0.06            | 16.7                         | 21.73                            | 2.14               |
| Iceland          |                        |        |        |        |        |        |        |        |        | 0.21   | 0.21                     | 0.03            | 94.5                         | 5.04                             | 4.18               |
| Ireland          | 5.20                   | 6.03   | 4.24   | 5.08   | 12.09  | 15.87  | 19.66  | 22.37  | 19.25  | 15.58  | 12.54                    | 1.68            | 55.8                         | 135.44                           | 9.26               |
| Italy            | 2.22                   | 5.75   | 2.60   | 5.08   | 3.27   | 5.99   | 6.47   | 4.61   | 6.36   | 8.05   | 5.04                     | 0.67            | 22.1                         | 624.55                           | 0.81               |
| Japan            | 14.15                  | 10.93  | 21.16  | 14.75  | 16.38  | 29.72  | 30.00  | 40.24  | 38.58  | 22.09  | 23.80                    | 3.19            | 18.2                         | 2387.08                          | 1.00               |
| Korea            |                        |        |        |        | 1.51   | 1.83   | 3.51   | 5.36   | 7.54   | 5.25   | 4.17                     | 0.56            | 6.7                          | 110.24                           | 2.83               |
| Luxembourg       | 0.25                   | 0.21   | 0.27   | 0.21   | 0.64   | 1.95   | 1.73   | 0.80   | 0.56   | 0.59   | 0.72                     | 0.10            | 74.2                         | 19.02                            | 3.79               |
| Netherlands      | 11.77                  | 6.77   | 5.07   | 4.91   | 3.01   | 7.05   | 9.51   | 5.24   | 4.40   | 1.35   | 5.91                     | 0.79            | 10.4                         | 644.44                           | 0.92               |
| New Zealand      | 0.67                   | 0.71   | 0.47   | 0.83   | 0.25   | 0.38   | 0.13   | 0.22   | 0.16   | 0.25   | 0.41                     | 0.05            | 48.6                         | 22.70                            | 1.79               |
| Norway           | 18.79                  | 12.69  | 21.10  | 21.44  | 19.50  | 19.22  | 15.86  | 16.00  | 12.85  | 11.30  | 16.87                    | 2.26            | 47.0                         | 673.94                           | 2.50               |
| Portugal         | 1.10                   | 0.59   | 0.78   | 1.00   | 0.90   | 0.60   | 0.37   | 0.64   | 0.41   | 0.48   | 0.69                     | 0.09            | 18.2                         | 177.26                           | 0.39               |
| Spain            | 4.94                   | 8.19   | 7.04   | 10.29  | 11.40  | 13.59  | 18.17  | 18.59  | 6.23   | 4.28   | 10.27                    | 1.38            | 41.1                         | 333.07                           | 3.08               |
| Sweden           | 6.39                   | 11.53  | 13.38  | 12.63  | 13.33  | 15.73  | 13.90  | 14.53  | 18.01  | 23.43  | 14.29                    | 1.91            | 34.6                         | 459.20                           | 3.11               |
| Switzerland      | 2.63                   | 2.61   | 3.23   | 1.68   | 2.26   | 2.61   | 2.91   | 4.02   | 2.41   | 5.14   | 2.95                     | 0.39            | 11.3                         | 220.67                           | 1.34               |
| UAE              |                        |        |        |        |        |        |        |        | 5.23   | 0.22   | 1.00                     | 2.15            | 20.1                         | 92.64                            | 2.32               |
| United Kingdom   | 15.98                  | 26.96  | 32.46  | 43.38  | 53.63  | 49.67  | 46.35  | 55.13  | 72.52  | 82.87  | 47.90                    | 6.41            | 69.4                         | 1245.46                          | 3.85               |
| United States    | 44.33                  | 115.87 | 204.14 | 338.53 | 332.28 | 306.84 | 374.28 | 505.07 | 533.12 | 508.36 | 326.28                   | 43.68           | 80.4                         | 8050.81                          | 4.05               |

## Multilateral

|                            |               |               |               |               |               |               |               |               |               |                |               |               |             |                 |             |
|----------------------------|---------------|---------------|---------------|---------------|---------------|---------------|---------------|---------------|---------------|----------------|---------------|---------------|-------------|-----------------|-------------|
| AfDF*                      | 1.33          | 1.48          | 2.93          | 3.48          | 3.34          | 0.38          | 5.11          | 4.74          | 1.68          | 1.93           | 2.64          | 0.35          | 28.2        | 443.70          | 0.60        |
| Arab Fund                  |               |               |               |               |               |               |               |               |               | 0.04           | 0.04          | 0.01          | 0.0         | 141.23          | 0.03        |
| AsDB                       |               |               |               |               |               |               |               |               | 0.82          | 0.75           | 0.79          | 0.11          | 0.0         | 468.82          | 0.17        |
| Spec.Funds                 |               |               |               |               |               |               |               |               |               |                |               |               |             |                 |             |
| EU Institutions            | 14.66         | 11.58         | 20.91         | 36.35         | 51.64         | 52.03         | 22.47         | 23.65         | 22.77         | 41.76          | 29.78         | 3.99          | 21.2        | 1231.75         | 2.42        |
| GAVI*                      |               |               |               |               |               | 22.31         |               |               |               | 44.69          | 33.50         | 4.48          | 0.0         | 134.02          | 25.00       |
| Global Fund*               |               | 3.38          | 55.20         | 90.11         | 92.67         | 99.71         |               |               |               | 164.98         | 84.34         | 11.29         | 99.8        | 175.67          | 48.01       |
| IDA (World Bank)*          | 45.92         | 53.25         | 56.21         | 110.42        | 76.46         | 51.59         | 43.42         | 53.70         | 67.60         | 57.61          | 61.62         | 8.25          | 52.0        | 2339.73         | 2.63        |
| IDB Sp.Fund*               |               |               |               |               |               |               |               |               | 0.00          | 0.00           | 0.00          | 0.00          | 0.0         | 11.80           | 0.02        |
| IMF (Concess. Trust Funds) | 18.75         | 4.68          | 4.33          | 2.27          | 1.39          | 2.86          |               |               |               | 4.48           | 5.54          | 0.74          | 0.0         | 366.17          | 1.51        |
| OFID                       |               |               |               |               |               |               |               |               |               | 0.65           | 0.65          | 0.09          | 0.0         | 53.12           | 1.22        |
| UNAIDS*                    | 3.34          | 5.58          | 1.16          | 6.43          | 4.86          | 11.59         |               |               |               | 11.71          | 6.38          | 0.85          | 100.0       | 6.38            | 100.00      |
| UNDP                       |               |               | 2.97          | 4.35          | 5.33          | 4.03          |               |               |               | 3.95           | 4.12          | 0.55          | 87.4        | 127.48          | 3.24        |
| UNFPA                      | 41.12         | 56.07         | 46.99         | 48.05         | 51.35         | 55.86         |               |               |               | 62.90          | 51.76         | 6.93          | 100.0       | 51.76           | 100.00      |
| UNHCR                      |               |               |               |               |               |               |               |               |               | 1.02           | 1.02          | 0.14          | 0.0         | 51.11           | 2.00        |
| UNICEF                     | 25.48         | 26.99         | 20.20         | 23.90         | 21.22         | 22.67         |               |               |               | 24.30          | 23.54         | 3.15          | 58.8        | 172.92          | 13.61       |
| UNPBF                      |               |               |               |               |               | 0.00          |               |               |               | 0.00           | 0.00          | 0.00          | 0.0         | 29.27           | 0.00        |
| WFP                        |               |               |               |               |               |               |               |               |               | 3.32           | 3.32          | 0.44          | 29.9        | 73.03           | 4.55        |
| WHO                        |               |               |               |               |               |               |               |               |               | 5.26           | 5.26          | 0.70          | 43.7        | 29.93           | 17.59       |
| <b>Total</b>               | <b>303.51</b> | <b>411.97</b> | <b>567.90</b> | <b>831.72</b> | <b>831.71</b> | <b>861.60</b> | <b>677.74</b> | <b>864.01</b> | <b>911.35</b> | <b>1208.92</b> | <b>747.04</b> | <b>100.00</b> | <b>66.2</b> | <b>24568.53</b> | <b>3.04</b> |

Abbreviations: AfDF, African Development Fund; AFESD; The Arab Fund for Economic and Social Development; AsDB, Asian Development Bank; EU Institutions, European Union Institutions; Global Fund, Global Fund to fight AIDS, Tuberculosis, and Malaria; IDA, International Development Association; IDB Sp.Fund, Inter-American Development Bank, Special Operation Fund; IMF, International Monetary Fund; ODA, official development assistance; OFID, The OPEC Fund for International Development; RH, reproductive health; UNFPA, United Nations Population Fund; UNHCR, United Nations High Commissioner for Refugees; UAE, United Arab Emirates; UNICEF, United Nations Children's Fund; UNPBF, United Nations Peacebuilding Fund; WFP, World Food Programme; WHO, World Health Organisation.

\* Disbursed funds were all for HIV/AIDS and STD control.

<sup>a</sup> proportion (%) of mean RH ODA (2002-2011) from the direct RH ODA activities shown in Table 1.

Empty cells indicate no ODA disbursed by that donor in that year. Only data from donors that disbursed ODA in 2002-2011 presented.
